# Supplementary figures and images for: Macrophages regulate gastrointestinal motility through complement component 1q
Source: eLife journal article supplement (doi:10.7554/elife.78558), 2023-04-26

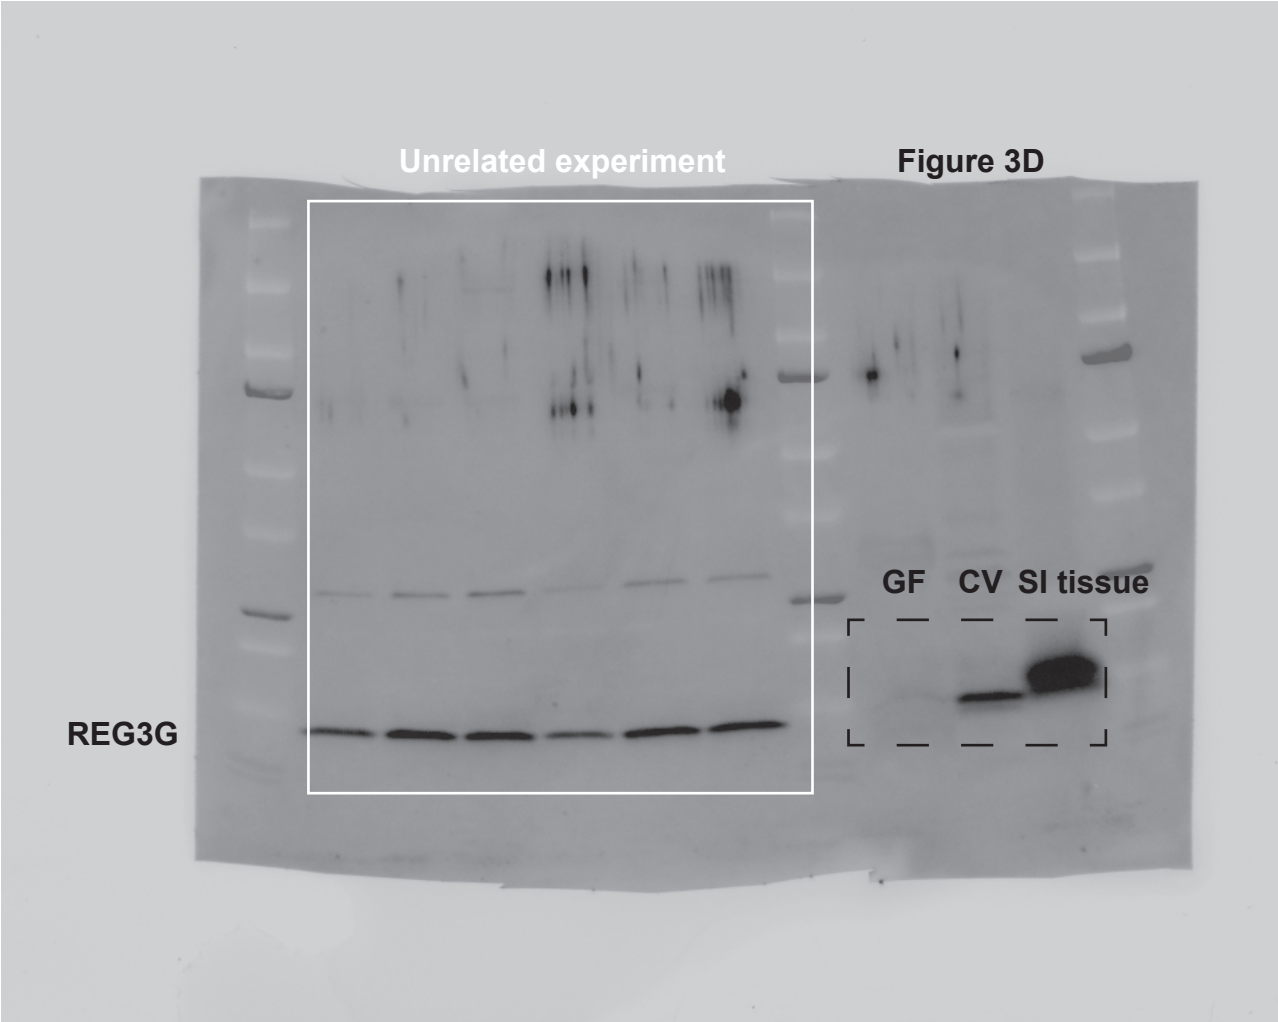

Supplement: supp [file elife-78558-supp-v1.zip]

Technical replicate

Figure 1D

Actin

Sub-epithelial  
Intraepithelial

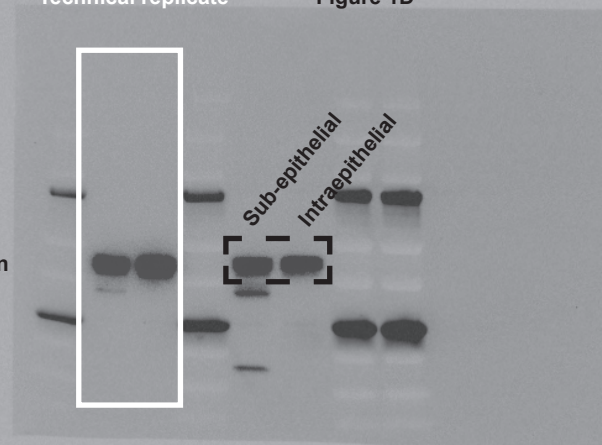

Supplement: supp [file elife-78558-supp-v1.zip]

Technical replicate

Figure 1D

C1q

Sub-epithelial  
Intraepithelial

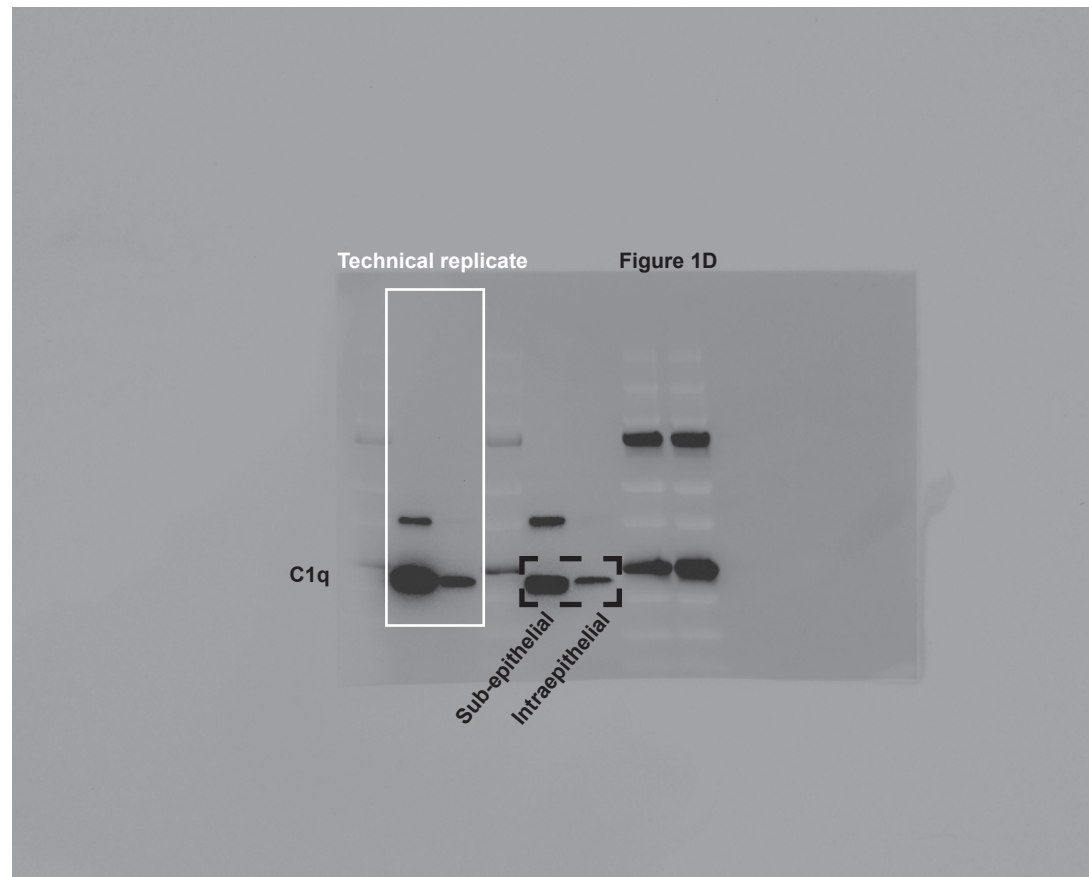

Supplement: supp [file elife-78558-supp-v1.zip]

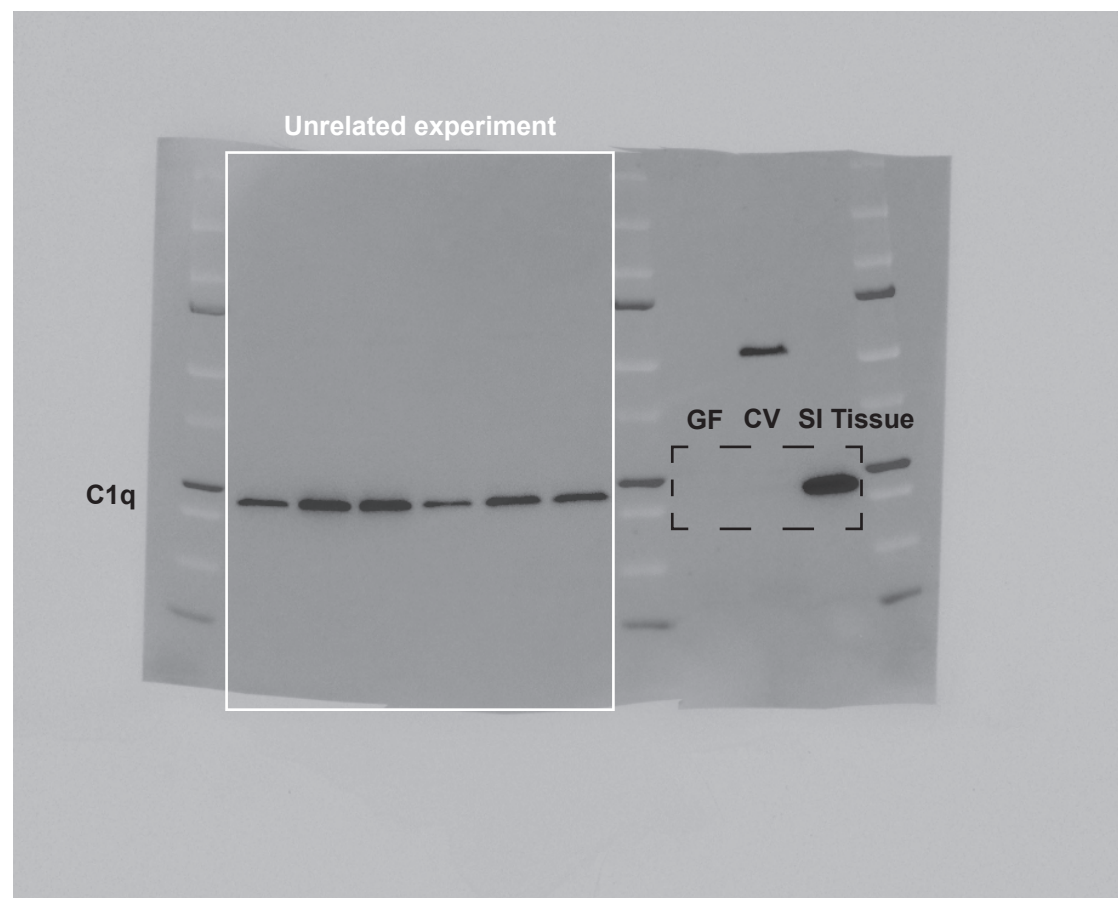

Supplement: supp [file elife-78558-supp-v1.zip]
